# Supplementary material for: Reaction of bisphenol A with synthetic and commercial MnOx(s): spectroscopic and kinetic study
Source: Royal Society of Chemistry journal article supplement (doi:10.1039/c8em00121a), 2018-01-01
Supplement: c8em00121a1.pdf [file c8em00121a1.pdf]

Electronic Supplementary Information

# Reaction of Bisphenol A with Synthetic and Commercial $\text{MnO}_{x(s)}$ : Spectroscopic and Kinetic Study

*Nabil Shaikh<sup>1\*</sup>, Huichun Zhang<sup>2,3</sup>, Kowsalya Rasamani<sup>3</sup>, Kateryna Artyushkova<sup>3</sup>, Abdul-Mehdi  
Ali<sup>4</sup>, and José M. Cerrato<sup>1</sup>*

\* Corresponding authors' email addresses: [mnabilshaikh@unm.edu](mailto:mnabilshaikh@unm.edu);

<sup>1</sup> Department of Civil Engineering, MSC01 1070, University of New Mexico, Albuquerque, New Mexico 87131, USA

<sup>2</sup> Department of Civil Engineering, Case Western Reserve University, 10900 Euclid Avenue, Cleveland, OH 44106, USA

<sup>3</sup> Department of Civil and Environmental Engineering, Temple University, 1947 N. 12th Street, Philadelphia, PA 19122, USA

<sup>4</sup> Department of Chemical & Biological Engineering, MSC01 1120, 1 University of New Mexico Albuquerque, NM 87131, USA

<sup>5</sup> Department of Earth and Planetary Sciences, MSC03 2040, University of New Mexico, Albuquerque, New Mexico 87131, USA

## Contents

|                                                                                                                                                                                                                                                                                                                                                                                                      |     |
|------------------------------------------------------------------------------------------------------------------------------------------------------------------------------------------------------------------------------------------------------------------------------------------------------------------------------------------------------------------------------------------------------|-----|
| <b>Table S1.</b> Summary of physical and chemical characteristics of MnO <sub>x</sub> (s) media used in this study. ....                                                                                                                                                                                                                                                                             | S3  |
| <b>Table S2.</b> Mn 3s multiplet splitting results for a) Reference Mn oxides and b) control and reacted samples. Curve 1 and curve 2 corresponds to the position/binding energy of <sup>5</sup> S and <sup>7</sup> S for each sample. ....                                                                                                                                                          | S4  |
| <b>Table S3.</b> Percentage composition of oxygen species obtained from fitting high resolution XPS O 1s spectra. ....                                                                                                                                                                                                                                                                               | S5  |
| <b>Table S4.</b> Percentage composition of carbon species obtained from fitting high resolution XPS C 1s spectra. ....                                                                                                                                                                                                                                                                               | S6  |
| <b>Figure S1.</b> Batch reactors (200mL) with corresponding reaction conditions used to for study of BPA removal with MnO <sub>x</sub> (s).....                                                                                                                                                                                                                                                      | S7  |
| <b>Figure S2.</b> Amount of BPA removed solely by adsorption onto (a) Syn-MnO <sub>x</sub> and (b) Com-MnO <sub>x</sub> . The maximum adsorbed amount was calculated by extrapolating the data to time=0.....                                                                                                                                                                                        | S8  |
| <b>Figure S3.</b> Fitting of O 1s XPS high resolution spectra for replicate samples of (a) SynMnO <sub>x</sub> Control (b) SynMnO <sub>x</sub> Reacted (c) ComMnO <sub>x</sub> Control and (d) ComMnO <sub>x</sub> Reacted. The sample XPS spectra are shown as the black dashed lines; the solid green lines are the overall contribution due to fitting of different individual oxygen bonds. .... | S9  |
| <b>Figure S4.</b> Fitting of C 1s XPS high resolution spectra for replicate samples of (a) SynMnO <sub>x</sub> Control (b) SynMnO <sub>x</sub> Reacted (c) ComMnO <sub>x</sub> Control and (d) ComMnO <sub>x</sub> Reacted. The sample XPS spectra are shown as the dashed black lines; the green solid lines are the overall contribution due to fitting of different individual carbon bonds. .... | S10 |

**Table S1.** Summary of physical and chemical characteristics of MnO<sub>x</sub>(s) media used in this study.

|                                                | Com-MnO <sub>x</sub> | Syn-MnO <sub>x</sub> |
|------------------------------------------------|----------------------|----------------------|
| <b>Specific surface area (m<sup>2</sup>/g)</b> | 13.6                 | 128.3                |
| <b>Elemental composition (%)</b>               |                      |                      |
| Manganese                                      | 71.2                 | 99.9 <sup>a</sup>    |
| Aluminum                                       | 9.65                 | -                    |
| Iron                                           | 8.97                 | -                    |
| Silicon                                        | 6.88                 | -                    |
| Potassium                                      | 1.34                 | -                    |
| Titanium                                       | 0.425                | -                    |
| Barium                                         | 0.367                | -                    |
| Calcium                                        | 0.302                | -                    |

Specific surface area data from Multipoint – N<sub>2</sub> BET; Elemental composition data from X-ray Fluorescence (XRF); <sup>a</sup> data from SEM/EDS

a)

**Table S2.** Mn 3s multiplet splitting results for a) Reference Mn oxides and b) control and reacted samples. Curve 1 and curve 2 corresponds to the position/binding energy of  $^{55}\text{S}$  and  $^{75}\text{S}$  for each sample.

|                                | Sample                                   | Curve 1:<br>Mn $^{55}\text{S}$ (eV) | Curve 2: Mn<br>$^{75}\text{S}$ (eV) | Multiplet<br>Splitting (eV) | Oxidation State |
|--------------------------------|------------------------------------------|-------------------------------------|-------------------------------------|-----------------------------|-----------------|
| <b>b)</b><br><u>References</u> | MnO; Mn(II)                              | 89.10                               | 83.40                               | 5.69                        | 2               |
|                                | Mn <sub>2</sub> O <sub>3</sub> ; Mn(III) | 88.52                               | 83.20                               | 5.33                        | 3               |
|                                | Li Mn(III,IV)O                           | 88.94                               | 84.05                               | 4.90                        | 3.5             |
|                                | MnO <sub>2</sub> ; Mn(IV)                | 88.89                               | 84.52                               | 4.38                        | 4               |
| <u>Samples</u>                 | Syn-MnO <sub>x</sub> Control             | 89.40                               | 84.77                               | 4.63                        | 3.7             |
|                                | Syn-MnO <sub>x</sub> Reacted             | 89.27                               | 84.45                               | 4.82                        | 3.4             |
|                                | Com-MnO <sub>x</sub> Control             | 87.04                               | 82.57                               | 4.47                        | 3.9             |
|                                | Com-MnO <sub>x</sub> Reacted             | 87.93                               | 83.25                               | 4.68                        | 3.7             |

**Table S3.** Percentage composition of oxygen species obtained from fitting high resolution XPS O 1s spectra. Uncertainty shown is standard deviation for triplicate data.

| <b>BE-&gt;</b>          | <b>529.6</b> | <b>531.2</b> | <b>532.5</b> | <b>533.7</b> | <b>535.0</b> |
|-------------------------|--------------|--------------|--------------|--------------|--------------|
|                         | MnOx         | O=N-C/ C=O   | -C-OH        | C-O-C / COOH | C-O-O-C      |
| <b>Syn-MnOx Control</b> | 59.4 ± 3.8   | 19.4 ± 1.3   | 13.3 ± 1.2   | 7.9 ± 1.3    | 0.0          |
| <b>Syn-MnOx Reacted</b> | 33.0 ± 1.4   | 23.3 ± 0.5   | 20.7 ± 0.1   | 17.7 ± 0.7   | 5.3 ± 0.6    |
| <b>Com-MnOx Control</b> | 17.2 ± 1.5   | 19.8 ± 0.2   | 28.4 ± 1.7   | 22.1 ± 1.3   | 12.5 ± 1.3   |
| <b>Com-MnOx Reacted</b> | 13.7 ± 0.4   | 14.0 ± 6.1   | 20.6 ± 4.1   | 30.0 ± 2.6   | 21.6 ± 8.0   |

**Table S4.** Percentage composition of carbon species obtained from fitting high resolution XPS C 1s spectra. Uncertainty shown is standard deviation for triplicate data.

| <b>Binding Energy (eV) -&gt;</b> | <b>284.7</b> | <b>285.6</b> | <b>287.2</b> | <b>288.5</b> |
|----------------------------------|--------------|--------------|--------------|--------------|
|                                  | C-C/C=C      | C*-C-Ox      | C-OH         | C=O          |
| <b>Syn-MnOx Control</b>          | 65.2 ± 3.3   | 4.4 ± 1.1    | 21.2 ± 3.1   | 9.2 ± 1.4    |
| <b>Syn-MnOx Reacted</b>          | 63.4 ± 2.2   | 0.4 ± 0.3    | 26.6 ± 0.8   | 9.7 ± 1.6    |
| <b>Com-MnOx Control</b>          | 34.7 ± 6.1   | 3.2 ± 0.3    | 33.0 ± 4.0   | 29.1 ± 9.7   |
| <b>Com-MnOx Reacted</b>          | 26.4 ± 8.4   | 1.2 ± 0.04   | 40.9 ± 5.7   | 31.5 ± 2.6   |

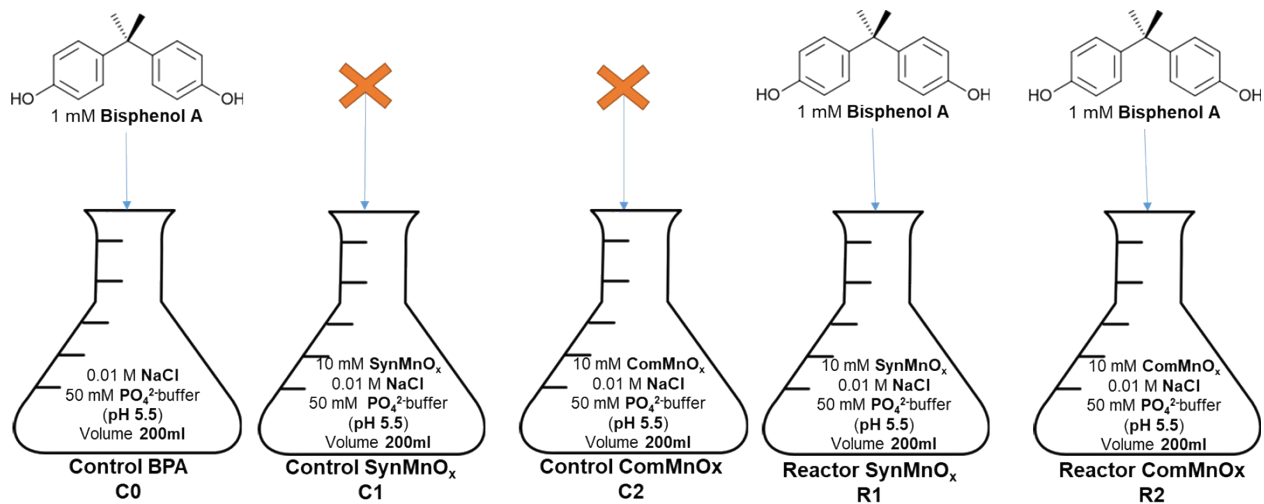

**Figure S1.** Batch reactors (200mL) with corresponding reaction conditions used to for study of BPA removal with MnO<sub>x</sub>(s).

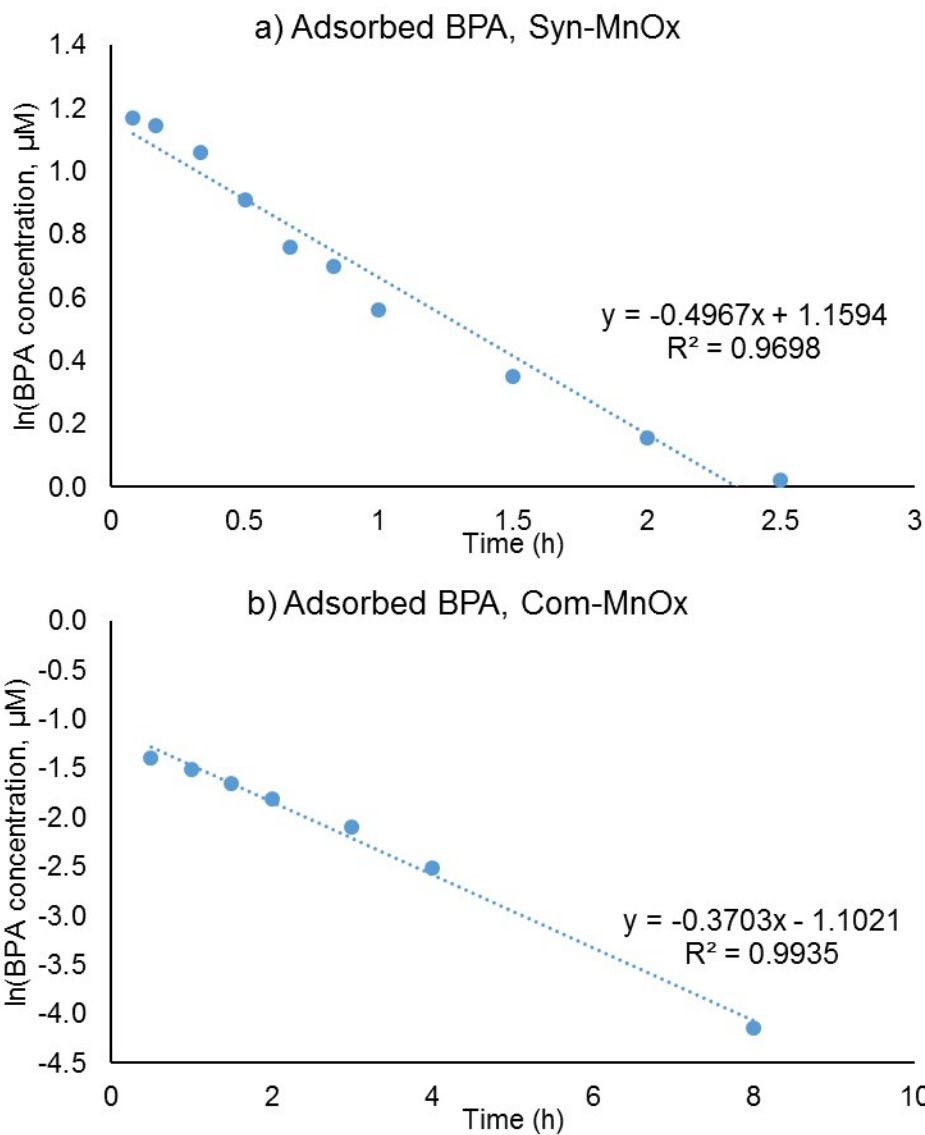

**Figure S2.** Amount of BPA removed solely by adsorption onto (a) Syn-MnO<sub>x</sub> and (b) Com-MnO<sub>x</sub>. The maximum adsorbed amount was calculated by extrapolating the data to time=0.



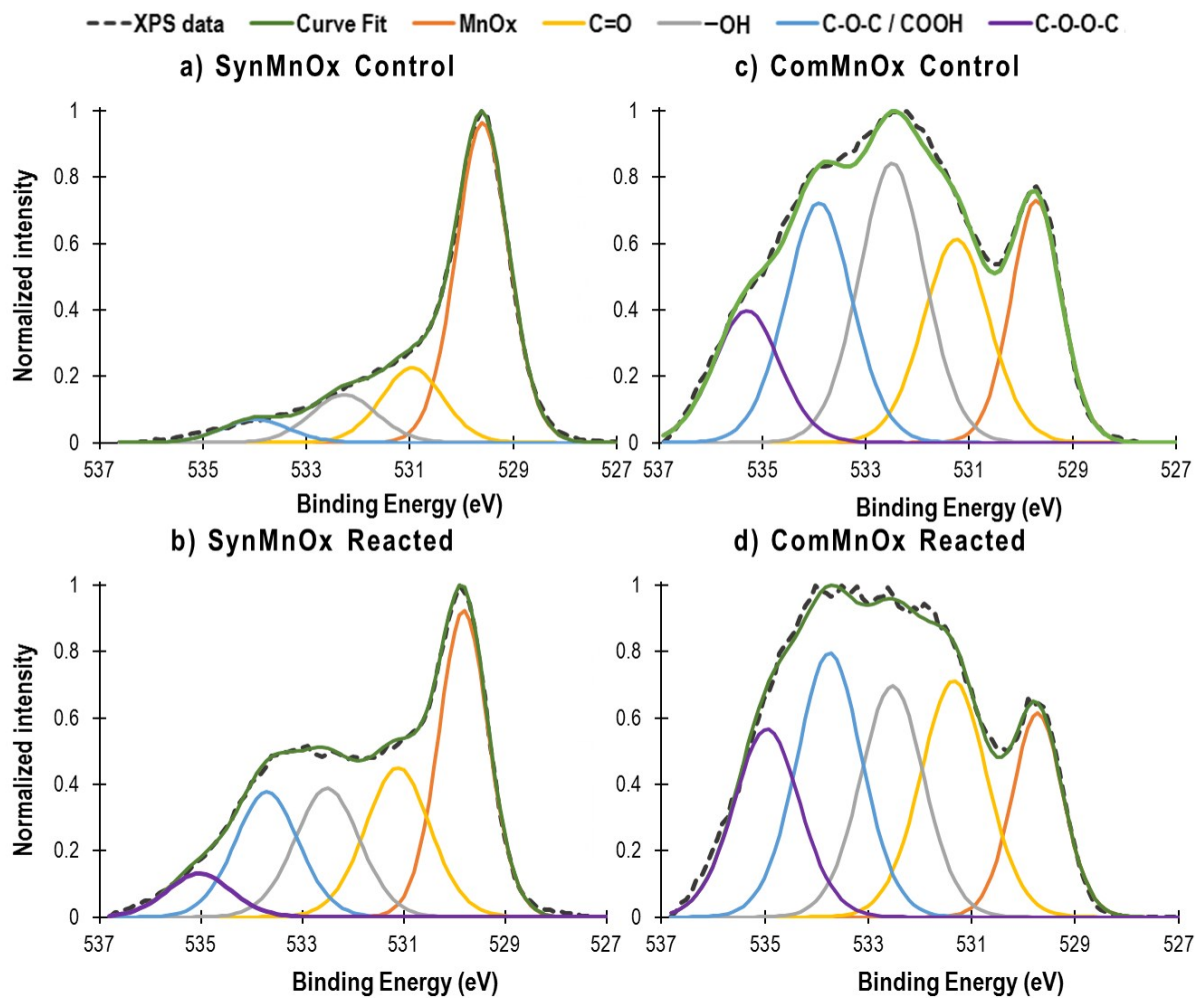

**Figure S3.** Fitting of O 1s XPS high resolution spectra for replicate samples of (a) SynMnO<sub>x</sub> Control (b) SynMnO<sub>x</sub> Reacted (c) ComMnO<sub>x</sub> Control and (d) ComMnO<sub>x</sub> Reacted. The sample XPS spectra are shown as the black dashed lines; the solid green lines are the overall contribution due to fitting of different individual oxygen bonds.

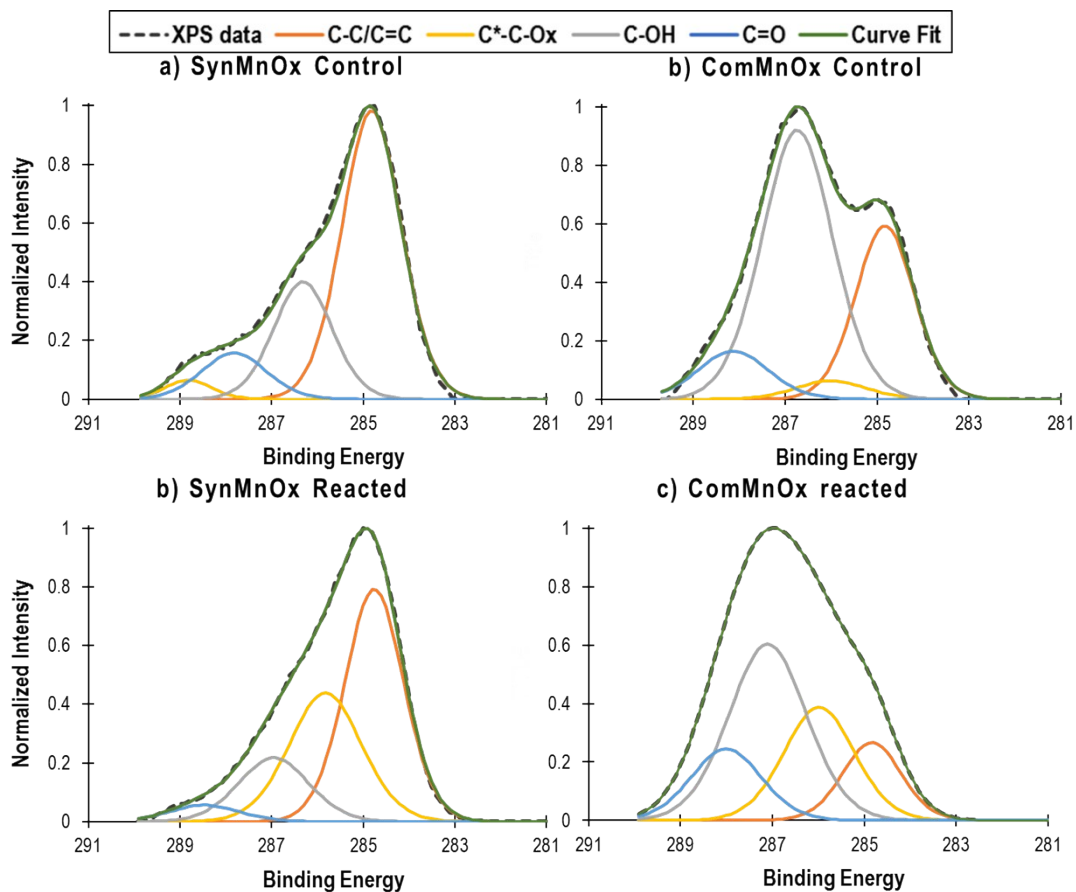

**Figure S4.** Fitting of C 1s XPS high resolution spectra for replicate samples of (a) SynMnO<sub>x</sub> Control (b) SynMnO<sub>x</sub> Reacted (c) ComMnO<sub>x</sub> Control and (d) ComMnO<sub>x</sub> Reacted. The sample XPS spectra are shown as the dashed black lines; the green solid lines are the overall contribution due to fitting of different individual carbon bonds.
